# Supplementary material for: The evolution of social health insurance in Vietnam and its role towards achieving universal health coverage
Source: PubMed Central journal article supplement — Health Policy Open. 2020 Aug 28;1:100011. doi: 10.1016/j.hpopen.2020.100011 (PMC10297761; doi:10.1016/j.hpopen.2020.100011), 2020-08-28
Supplement: mmc1.pdf [file mmc1.pdf]

**Appendix 1: Social health insurance benefit coverage by stage of development**

| Service coverage |                                                                                                                         | Stage I   | Stage II    | Stage III   | Stage IV         | Stage V          |
|------------------|-------------------------------------------------------------------------------------------------------------------------|-----------|-------------|-------------|------------------|------------------|
|                  |                                                                                                                         | 1992-1998 | 1998 – 2005 | 2005 – 2008 | 2008 – 2014      | 2014 – now       |
| 1                | Inpatient                                                                                                               | ✓         | ✓           | ✓           | ✓                | ✓                |
| -                | Inpatient with bypassing                                                                                                |           |             |             | ✓ <sup>(2)</sup> | ✓ <sup>(3)</sup> |
| 2                | Outpatient                                                                                                              | ✓         | ✓           | ✓           | ✓                | ✓                |
| -                | Outpatient with bypassing                                                                                               |           |             |             | ✓ <sup>(2)</sup> |                  |
| 3                | Consultation fee                                                                                                        | ✓         | ✓           | ✓           | ✓                | ✓                |
| 4                | Pathology                                                                                                               | ✓         | ✓           | ✓           | ✓                | ✓                |
| 5                | Medications and Consumables                                                                                             |           | ✓           | ✓           | ✓                | ✓                |
| 6                | Essential Drugs List (number medications covered)                                                                       |           | ✓           | ✓           | ✓                | ✓                |
| 7                | Pregnancy check up                                                                                                      |           |             | ✓           | ✓                | ✓                |
| 8                | Transportation support for vulnerable                                                                                   |           |             | ✓           | ✓                | ✓                |
| 9                | Medication and consumable in essential lists <sup>(1)</sup>                                                             | ✓         | ✓           | ✓           | ✓                | ✓                |
| 10               | Screening                                                                                                               |           |             |             | ✓ <sup>(4)</sup> |                  |
| 11               | Treatment of squint, short-sightedness and refractive defects for children under 6                                      |           |             |             |                  | ✓                |
| 12               | Treatment in case of suicide or self-inflicted injuries and physical or mental injuries caused by own law-breaking acts |           |             |             |                  | ✓                |
| 13               | Sexual transmitted disease: syphilis, gonorrhoea, HIV/AIDS                                                              |           |             |             | ✓                | ✓                |
| 14               | Birth defect and inborn diseases                                                                                        |           |             | ✓           | ✓                | ✓                |

Sources: (1-5)

**Notes:***(1) Essential Drugs List*

The essential drugs list was introduced in 2005 and covered both “modern” and traditional medications (6). The list was revised for both types of medications in each stage, but not necessarily together (7-14). Over time, the number of “modern medications” covered has increased significantly reaching 1,201 types of medication including combination therapies in 2017. Authority to prescribe depends on the specialisation of the health provider and hospital classification (11-13, 15). In 2015, the traditional list contained 229 preparations and 349 ingredients (14), which could be prescribed by all providers in all hospitals. A separate list of radiopharmaceuticals (radioactive drugs and diagnostic agents) was introduced in 2006 during Stage III (16). These 57 agents can be prescribed by specialist oncology providers only.

(2) Part payment for bypassing both inpatient and outpatient services. Payment rates were 70% at the district level, 50% at the provincial level, 30% at the level of national providers

(3) Part payment for bypassing for only inpatient services. Payment rates were 70% in district level, 60% in provincial level, 40% in national level providers

(4) Screening was never introduced because the Ministry of Health did not release a list of screening services for SHI reimbursement.

## References

1. Government of Vietnam. Nghị định 299-HĐBT ban hành Nghị định Điều lệ bảo hiểm Y tế [Decree 299-HĐBT on Health Insurance Principles]. Hanoi: Government of Vietnam; 1992.
2. Government of Vietnam. Nghị định số 58/1988/NĐ-CP ngày 13 tháng 8 năm 1989 ban hành Điều lệ bảo hiểm y tế [Decree 58/1988/NĐ-CP 13/8/1989 on Health Insurance Principles]. Hanoi: Government of Vietnam; 1989.
3. Government of Vietnam; Nghị định của Chính phủ số 63/2005/NĐ-CP ngày 16/5/2005 ban hành điều lệ bảo hiểm y tế [Decree 63/2005/NĐ-CP on 16/5/2005 on Health Insurance Principles]. Hanoi: Government of Vietnam; 2005.
4. National Assembly. Luật Bảo hiểm y tế số 25 [Law on Health Insurance 25]. Hanoi, National Assembly; 2008.
5. National Assembly. Luật Bảo hiểm y tế số 46 [Law on Health Insurance 46]. Hanoi, National Assembly; 2014.
6. Vietnam Ministry of Health. Quyết định 03/2005/QĐ-BYT về việc ban hành danh mục thuốc chữa bệnh chủ yếu dùng tại các cơ sở khám chữa bệnh [Decision no: 03/2005/QĐ-BYT Release of List of Drugs for use in Health Facilities]. Hanoi: Vietnam Ministry of Health; 2005.
7. Vietnam Ministry of Health. Quyết định số 05/2008/QĐ-BYT Về việc ban hành Danh mục thuốc chữa bệnh chủ yếu sử dụng tại các cơ sở khám bệnh, chữa bệnh [Decision 05/2008/QĐ-BYT: Release of List of Drugs for Use in Health Care Facilities]. Hanoi: Vietnam Ministry of Health; 2008.
8. Vietnam Ministry of Health. Quyết định 10/2008/QĐ-BYT về việc bổ sung danh mục thuốc chế phẩm y học cổ truyền (Ban hành kèm theo Quyết định số 05/2008/QĐ-BYT ngày 01/02/2008 của Bộ trưởng Bộ y tế) [Decision 10/2008/QĐ-BYT on 22/02/2008 Amending Decision 05/2008/QĐ-BYT on 01/02/2008 about List of Traditional Medicines]. Hanoi: Vietnam Ministry of Health; 2008.
9. Vietnam Ministry of Health. Thông tư 02/2010/TT-BYT Ban hành danh mục thuốc bổ sung sử dụng cho trẻ em dưới 6 tuổi thuộc phạm vi thanh toán của Quỹ Bảo hiểm y tế [Circular 02/2010/TT-BYT Additional List of Drugs for Children Under 6 as Health Insurance Benefit]. Hanoi: Vietnam Ministry of Health; 2010.
10. Vietnam Ministry of Health . Thông tư 12/2010/TT-BYT Ban hành Danh mục thuốc y học cổ truyền chủ yếu sử dụng tại các cơ sở khám chữa bệnh [Circular 12/2010/TT-BYT Regulating List of Traditional Medications Used in Health Facilities]. Hanoi: Vietnam Ministry of Health; 2010.
11. Vietnam Ministry of Health. Thông tư 31/2011/TT-BYT ban hành và hướng dẫn thực hiện danh mục thuốc chủ yếu sử dụng tại các cơ sở khám chữa bệnh được quỹ bảo hiểm y tế thanh toán [Circular 31/2011/TT-BYT on 11/7/2011 Regulating List of Essential Drugs Under Health Insurance Benefit]. Hanoi: Vietnam Ministry of Health; 2011.
12. Vietnam Ministry of Health. Thông tư 10/2012/TT-BYT Sửa đổi, bổ sung một số điều của Thông tư số 31/2011/TT-BYT ngày 11/07/2011 ban hành và hướng dẫn thực hiện Danh mục thuốc chủ yếu sử dụng tại các cơ sở khám bệnh, chữa bệnh được quỹ Bảo hiểm y tế thanh toán [Circular 10/2012/TT-BYT in 08/6/2012 Amending Circular 31/2011/TT-BYT about Essential Drugs List Under Health Insurance Benefit]. Hanoi: Vietnam Ministry of Health; 2011.
13. Vietnam Ministry of Health . Thông tư 40/2014/TT-BYT Ban hành và hướng dẫn thực hiện danh mục thuốc tân dược thuộc phạm vi thanh toán của Quỹ Bảo hiểm y tế [Circular 40/2014/TT-BYT on Regulating Medication Drugs List under Health Insurance Benefit]. Hanoi: Vietnam Ministry of Health; 2014.

14. Vietnam Ministry of Health. Thông tư 05/2015/TT-BYT Ban hành Danh mục thuốc đông y, thuốc từ dược liệu và vị thuốc y học cổ truyền thuộc phạm vi thanh toán của quỹ bảo hiểm y tế [Circular 05/2015/TT-BYT Regulating List of Traditional Medications under Health Insurance Benefit]. Hanoi: Vietnam Ministry of Health; 2015.
15. Vietnam Ministry of Health. Thông tư 07/2017/TT-BYT ban hành Danh mục thuốc không kê đơn [Circular 07/2017/TT-BYT promulgated the List of drugs without prescription]. Hanoi: Vietnam Ministry of Health; 2017.
16. Vietnam Ministry of Health. Quyết định 33/2006/QĐ-BYT của Bộ trưởng Bộ Y tế Về việc ban hành Danh mục thuốc phóng xạ và hợp chất đánh dấu dùng trong chẩn đoán và điều trị [Decision 33/2006/QĐ-BYT Regulating List of Radioactive Drugs and Other Diagnostic Agents]. Hanoi: Vietnam Ministry of Health; 2006.
