# Supplementary material for: The evolution of social health insurance in Vietnam and its role towards achieving universal health coverage
Source: PubMed Central journal article supplement — Health Policy Open. 2020 Aug 28;1:100011. doi: 10.1016/j.hpopen.2020.100011 (PMC10297761; doi:10.1016/j.hpopen.2020.100011), 2020-08-28
Supplement: mmc2.pdf [file mmc2.pdf]

## **Appendix 2: Premium and premium subsidy for social health insurance by stage of development**

Premiums were set at a proportion of salary for workers, and contributions were paid by both employers and employees. For the informal sector and students, premiums were initially set as a fixed amount then changed to a proportion of the basic (minimum) salary. Partial or full government subsidisation was provided to ensure financial protection for those who were vulnerable. Government subsidisation commenced in Stage II for two groups: those under social protection including older people and those with meritorious services to the revolution (1). In Stage III, subsidisation was extended to nine groups including the poor, elderly persons over 90 years of age, veterans, people with loss of working capacity, and scholarship-funded international student (2). For poor people, the Provincial People's Committees had the option of using funds from the Health Care Fund for Poor People to purchase voluntary health insurance between 1998 and 2005 (3). After 2005, the state government funded their SHI, and the Health Care Fund for Poor People was terminated (Figure 1) (2). In Stage IV, full or partial subsidisation was extended to children under 6 years of age, the near poor with an income less than 30 percent above that of poor people, and organ donors (4, 5), and in Stage V to people living in areas with difficult or exceptionally difficult socio-economic conditions (6, 7).

Co-payments were not required in Stage I (8), but in Stage II, a 20% co-payment rate was applied for all categories, and a co-payment ceiling was introduced to protect against catastrophic expenditure (1). Co-payments (and the ceiling) were removed in Stage III (2). In Stage IV, co-payments were re-introduced at 20%, except for poor people whose co-payments were 5%, and children under 6 years of age and people

with meritorious services who had no co-payment (4, 5). In Stage V, co-payments for the poor were eliminated and those for near-poor were reduced to 5%. A co-payment ceiling was re-introduced for people with 5-years continuous enrolment (6, 7).

**Premium and premium subsidy for social health insurance by stage of development**

|                                    | <b>Stage I<br/>1992 -1998</b> | <b>Stage II<br/>1998 – 2005</b>                                                                                | <b>Stage III<br/>2005 – 2008</b>                                                                                                                                                                                                                                                                                                                                                                                                                         | <b>Stage IV<br/>2008 – 2014</b>                                     | <b>Stage V<br/>2014 – now</b>                                                                                               |
|------------------------------------|-------------------------------|----------------------------------------------------------------------------------------------------------------|----------------------------------------------------------------------------------------------------------------------------------------------------------------------------------------------------------------------------------------------------------------------------------------------------------------------------------------------------------------------------------------------------------------------------------------------------------|---------------------------------------------------------------------|-----------------------------------------------------------------------------------------------------------------------------|
| <b>Premium</b>                     |                               |                                                                                                                |                                                                                                                                                                                                                                                                                                                                                                                                                                                          |                                                                     |                                                                                                                             |
| - Employee and pensioner (monthly) | 3% salary/pension             | 3% salary/pension                                                                                              | 3% salary/pension                                                                                                                                                                                                                                                                                                                                                                                                                                        | 4.5% salary/pension                                                 | 4.5% salary/pension                                                                                                         |
| - Student and school pupil         |                               | 25,000 – 70,000 (VND/year)                                                                                     | 50,000-120,000 (VND/year)                                                                                                                                                                                                                                                                                                                                                                                                                                | 3% basic salary (monthly)                                           | 4.5% basic salary (monthly)                                                                                                 |
| Others                             |                               | 60,000 – 140,000                                                                                               | 120,000 – 320,000                                                                                                                                                                                                                                                                                                                                                                                                                                        | 4.5% basic salary                                                   | 4.5% basic salary                                                                                                           |
| <b>100% subsidy</b>                |                               | 2 groups:<br>- People with meritorious services to revolution<br>- People on monthly social welfare allowance. | 9 groups, new inclusions:<br>- Relatives of people with meritorious services to revolution<br>- Veterans and their dioxin-affected children<br>- Army and police force and relatives<br>- Elderly over 90 years of age<br>- The poor and ethnic minority people living in areas with difficult or exceptionally difficult socio-economic conditions<br>- Foreigners studying in Vietnam who are granted scholarships from the Vietnamese State's budget. | 11 groups, new inclusions:<br>- Children under 6<br>- Organ donors. | 13 groups, new inclusions:<br>- People living in areas with difficult or exceptionally difficult socio-economic conditions. |
| <b>Part subsidy</b>                |                               |                                                                                                                |                                                                                                                                                                                                                                                                                                                                                                                                                                                          | - Near poor<br>- Students and pupils<br>- Farmer households         | Same as Stage IV                                                                                                            |
| <i>Sources: (1, 2, 4-12)</i>       |                               |                                                                                                                |                                                                                                                                                                                                                                                                                                                                                                                                                                                          |                                                                     |                                                                                                                             |

**References**

1. Government of Vietnam. Nghị định số 58/1988/NĐ-CP ngày 13 tháng 8 năm 1989 ban hành Điều lệ bảo hiểm y tế [Decree 58/1988/NĐ-CP on Health Insurance Principles, 13/8/1988]. Hanoi: Government of Vietnam; 1998.
2. Government of Vietnam. Nghị định của Chính phủ số 63/2005/NĐ-CP ngày 16/5/2005 ban hành điều lệ bảo hiểm y tế [Decree 63/2005/NĐ-CP on Health Insurance Principles, 16/5/2005]. Hanoi: Government of Vietnam; 2005.
3. Government of Vietnam. Quyết định 139/2002/QĐ-TTg của Thủ tướng Chính phủ về việc Khám, chữa bệnh cho người nghèo [Decision no 139/2002/QĐ-TTg on 15/10/2002 of the Prime Minister on Health Care for Poor People]. Hanoi: Vietnam Government Cabinet; 2002.
4. National Assembly of Vietnam. Luật Bảo hiểm y tế số 25 [Law on Health Insurance 25]. Hanoi: National Assembly of Vietnam; 2008.
5. Government of Vietnam. Nghị định 62/2009/NĐ-CP Quy định chi tiết và hướng dẫn thi hành một số điều của Luật bảo hiểm y tế [Decree 62/2009/NĐ-CP Guiding Health Insurance Law 25]. Hanoi: Government of Vietnam; 2009).
6. National Assembly of Vietnam, Luật Bảo hiểm y tế số 46 [Law on Health Insurance 46]. Hanoi: National Assembly of Vietnam; 2014.
7. Government of Vietnam. Nghị định số 105/2014/NĐ-CP của Chính phủ : Quy định chi tiết và hướng dẫn thi hành một số điều của Luật Bảo hiểm y tế [Decree 105/2014/NĐ-CP of 15/11/2014 on Guiding Health Insurance Law 46]. Hanoi: Vietnam Government Cabinet; 2014.
8. Government of Vietnam. Nghị định 299-HĐBT ban hành Nghị định Điều lệ bảo hiểm Y tế [Decree 299-HĐBT on Health Insurance Principles]. Hanoi: Government of Vietnam; 1992.
9. Vietnam Ministry of Health. Thông tư Liên Bộ Y tế - Tài chính - Lao động - Thương binh và Xã hội số 12/TTLB hướng dẫn thi hành Nghị định số 299-HĐBT ngày 15-8-1992 của Hội đồng Bộ trưởng ban hành điều lệ bảo hiểm y tế [Circular 12/TTLB Guiding Decree 299 on Health Insurance Principles]. Hanoi: Vietnam Ministry of Health; 1992.
10. Vietnam Ministry of Health. Báo cáo 15 năm thực hiện bảo hiểm y tế [15 Years Progress Report of Health Insurance Implementation]. Hanoi: Vietnam Ministry of Health; 2007.
11. Government of Vietnam. Nghị định 47-CP ngày 06/6/1994 sửa đổi một số điều của Nghị định số 299-HĐBT ngày 15-8-1992 ban hành Điều lệ bảo hiểm y tế của Hội đồng Bộ trưởng [Decree 47-CP of 06/6/1994 on Health Insurance Principles]. Hanoi: Government of Vietnam; 1994.
12. Inter-Ministries of Vietnam. Thông tư liên tịch 09/2009/TTLT-BYT-BTC hướng dẫn thực hiện bảo hiểm y tế [Joint circular 09/2009/TTLT-BYT-BTC Guiding Health Insurance]. Hanoi: Vietnam Ministry of Health and Vietnam Ministry of Finance; 2009.
