# Supplementary material for: The evolution of social health insurance in Vietnam and its role towards achieving universal health coverage
Source: PubMed Central journal article supplement — Health Policy Open. 2020 Aug 28;1:100011. doi: 10.1016/j.hpopen.2020.100011 (PMC10297761; doi:10.1016/j.hpopen.2020.100011), 2020-08-28
Supplement: mmc3.pdf [file mmc3.pdf]

### Appendix 3: Revenue and expenditure by type of service under Social Health Insurance fund, Vietnam, 1993 - 2016

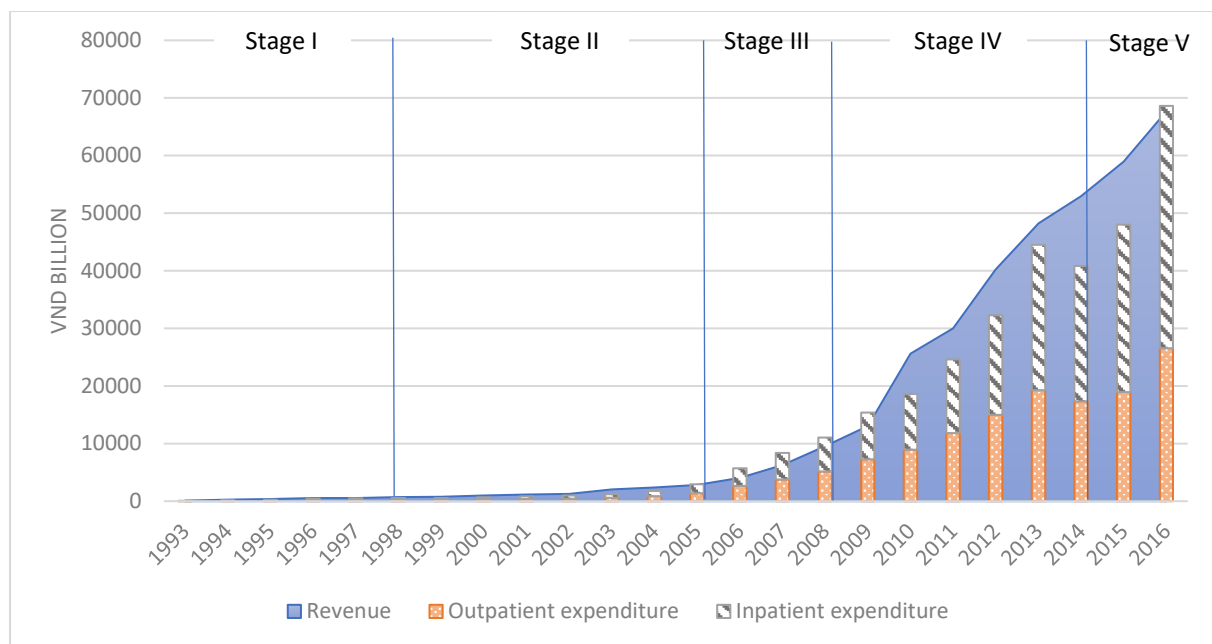

Sources: (1-5)

#### References:

1. Health Insurance Department of Vietnam Ministry of Health. Báo cáo dự báo cân đối quỹ Bảo hiểm y tế [Report on Forecasts of Health Insurance Fund Management]. Hanoi: Vietnam Ministry of Health; 2010.
2. Vietnam Social Security Agency. Estimation report on Social health insurance's revenue and expenditure in 2015. Hanoi: Vietnam Social Security Agency; 2015.
3. Social Affairs Committee of Vietnam National Assembly. Báo cáo 525/BC-UBTVQH13 Kết quả giám sát việc thực hiện chính sách, pháp luật về bảo hiểm y tế giai đoạn 2009 - 2012 [Report 525/BC-UBTVQH13 on Health Insurance Implementation 2009 - 2012]. Hanoi: Vietnam National Assembly; 2013 14/10/2013.
4. Vietnam Ministry of Health. Niên giám thống kê y tế [Health Statistics Yearbook 1993 to 2016]. Hanoi: Medicine Publishing House; Various.
5. Vietnam Social Security Agency. Báo cáo quyết toán tài chính năm 2008 - 2014 [Financial report 2008 - 2014]. Hanoi: Vietnam Social Security Agency; Various.
